# Supplementary material
Source: PubMed Central journal article supplement (PMC7694409)
Supplement: NIHMS1605918-supplement-S1.pdf [file NIHMS1605918-supplement-S1.pdf]

**Table S1.** Associations between chromosomal instability (CIN) and clinical outcome

| Cancer types                  | Approaches                                | Clinical implications                                                                                                                                                                                                                                                                                | Refs |
|-------------------------------|-------------------------------------------|------------------------------------------------------------------------------------------------------------------------------------------------------------------------------------------------------------------------------------------------------------------------------------------------------|------|
| Non-small cell lung cancer    | Fluorescence in situ hybridization (FISH) | <ul style="list-style-type: none"><li>• CIN is significantly correlated with a worse prognosis by multivariate and univariate analysis</li><li>• CIN may be an independent prognostic factor of poor clinical outcome</li></ul>                                                                      | (1)  |
| Breast cancer                 | Comparative genomic hybridization         | <ul style="list-style-type: none"><li>• Certain genomic lesions, especially 11q loss, can play a significant role in early-onset breast tumor formation</li><li>• Tumors containing TP53 mutations exhibit higher degrees of CIN</li></ul>                                                           | (2)  |
|                               | Dual centromeric FISH                     | <ul style="list-style-type: none"><li>• Increasing CIN was correlated with improved outcome in ER-negative breast cancer patients</li></ul>                                                                                                                                                          | (3)  |
| Diffuse large B-cell lymphoma | Chromosomal abnormality variations        | <ul style="list-style-type: none"><li>• Chromosomal abnormality variation identified by G-banding was correlated with prognosis of diffuse large B-cell lymphoma treated with R-CHOP (rituximab, cyclophosphamide, hydroxydaunomycin (doxorubicin), Oncovin (vincristine), and prednisone)</li></ul> | (4)  |
| Bladder cancer                | Real-time polymerase chain reaction       | <ul style="list-style-type: none"><li>• Levels of blood leukocyte with shorter telomere length might provide an additional noninvasive prognostic marker to better predict personalize treatments and survival in bladder cancer patients</li></ul>                                                  | (5)  |
| Multiple myeloma              | CIN genome even count (CINGEC)            | <ul style="list-style-type: none"><li>• CIN may potentially confer a unique prognostic factor of poor outcome that is not captured in the current landscape of prognostic signatures</li></ul>                                                                                                       | (6)  |
| Synovial sarcomas             | Complexity Index in Sarcoma               | <ul style="list-style-type: none"><li>• CIN may account for reverse metastatic outcomes of adult and pediatric synovial sarcomas</li></ul>                                                                                                                                                           | (7)  |
| Colorectal cancer             | Molecular analyses using tumor DNA        | <ul style="list-style-type: none"><li>• The interplay between microsatellite instability, chromosomal instability, and the CpG island methylator phenotype suggests that specific (epi)genotypes can hold differential prognostic value that may vary over time</li></ul>                            | (8)  |

## References:

1. Nakamura H, Saji H, Idiris A, Kawasaki N, Hosaka M, Ogata A, *et al.* Chromosomal instability detected by fluorescence in situ hybridization in surgical specimens of non-small cell lung cancer is associated with poor survival. *Clinical Cancer Res* **2003**;9:2294-9
2. Jong Y-J, Li L-H, Tsou M-H, Chen Y-J, Cheng SH, Wang-Wuu S, *et al.* Chromosomal comparative genomic hybridization abnormalities in early- and late-onset human breast cancers: correlation with disease progression and TP53 mutations. *Cancer Genet Cytogenet* **2004**;148:55-65
3. Jamal-Hanjani M, A'Hern R, Birkbak NJ, Gorman P, Gronroos E, Ngang S, *et al.* Extreme chromosomal instability forecasts improved outcome in ER-negative breast cancer: a prospective validation cohort study from the TACT trial. *Ann Oncol* **2015**;26:1340-6
4. Mizuno Y, Tsukamoto T, Kawata E, Uoshima N, Uchiyama H, Yokota I, *et al.* Chromosomal abnormality variation detected by G-banding is associated with prognosis of diffuse large B-cell lymphoma treated by R-CHOP-based therapy. *Cancer Med* **2018**;7:655-64
5. Russo A, Modica F, Guarrera S, Fiorito G, Pardini B, Viberti C, *et al.* Shorter leukocyte telomere length is independently associated with poor survival in patients with bladder cancer. *Cancer Epidemiol Biomark Prev* **2014**;23:2439-46
6. Chung T-H, Mulligan G, Fonseca R, Chng WJ. A novel measure of chromosome instability can account for prognostic difference in multiple myeloma. *PLoS ONE* **2013**;8:e66361
7. Lagarde P, Przybyl J, Brulard C, Perot G, Pierron G, Delattre O, *et al.* Chromosome instability accounts for reverse metastatic outcomes of pediatric and adult synovial sarcomas. *J Clin Oncol* **2013**;31:608-15
8. Simons CC, Hughes LA, Smits KM, Khalid-de Bakker CA, de Bruine AP, Carvalho B, *et al.* A novel classification of colorectal tumors based on microsatellite instability, the CpG island methylator phenotype and chromosomal instability: implications for prognosis. *Ann Oncol* **2013**;24:2048-56
